1 Short Article

2 **Production of Offspring from Azoospermic Mice with Meiotic**

3 **Failure: Precise Biparental Meiosis within Halved Oocytes**

4

5 Narumi Ogonuki<sup>1</sup>, Hirohisa Kyogoku<sup>2,3</sup>, Toshiaki Hino<sup>4</sup>, Yuki Osawa<sup>5</sup>, Yasuhiro

6 Fujiwara<sup>6</sup>, Kimiko Inoue<sup>1,7</sup>, Tetsuo Kunieda<sup>8</sup>, Seiya Mizuno<sup>9</sup>, Hiroyuki Tateno<sup>4</sup>,

7 Fumihiro Sugiyama<sup>9</sup>, Tomoya S. Kitajima<sup>2\*</sup>, Atsuo Ogura<sup>1,7,10, 11\*</sup>

8

9 <sup>1</sup>Bioresource Engineering Division, RIKEN BioResource Research Center,  
10 Ibaraki 305-0074, Japan.

11 <sup>2</sup>Laboratory for Chromosome Segregation, RIKEN Center for Biosystems  
12 Dynamics Research, Kobe, Hyogo 650-0047, Japan.

13 <sup>3</sup>Graduate School of Agricultural Science, Kobe University, Kobe, Hyogo  
14 657-8501, Japan.

15 <sup>4</sup>Department of Biological Sciences, Asahikawa Medical University, Asahikawa,  
16 Hokkaido 078-8510, Japan.

17 <sup>5</sup>Graduate School of Comprehensive Human Sciences, University of Tsukuba,  
18 Tsukuba, Ibaraki 305-8575, Japan.

19 <sup>6</sup>Laboratory of Pathology and Development, Institute for Quantitative  
20 Biosciences, The University of Tokyo, Yayoi, Bunkyo-ku, Tokyo 113-8657,  
21 Japan.

22 <sup>7</sup>Graduate School of Life and Environmental Sciences, University of Tsukuba,  
23 Tsukuba, Ibaraki 305-8572, Japan.

24 <sup>8</sup>Faculty of Veterinary Medicine, Okayama University of Science, Imabari, Ehime  
25 794-8555, Japan.

26 <sup>9</sup>Laboratory Animal Resource Center and Trans-border Medical Research  
27 Center, Faculty of Medicine, University of Tsukuba, Tsukuba, Ibaraki 305-8575,  
28 Japan.

29 <sup>10</sup>RIKEN Cluster for Pioneering Research, Wako, Saitama 351-0198, Japan.

30 <sup>11</sup>Lead contact

31 \*Correspondence: [tomoya.kitajima@riken.jp](mailto:tomoya.kitajima@riken.jp) and [ogura@rtc.riken.go.jp](mailto:ogura@rtc.riken.go.jp)

32

### 33 **SUMMARY**

34 **While the large volume of mammalian oocytes is necessary for embryo**  
35 **development, it can lead to error-prone chromosomal segregation during**  
36 **meiosis. Consequently, a smaller ooplasm might assure better**  
37 **chromosomal integrity of oocytes and embryos, but there is no evidence**  
38 **to support this hypothesis. Here, we show that reducing the ooplasm is**  
39 **beneficial for assisted fertilization using primary spermatocytes, involving**  
40 **synchronous biparental meiosis within oocytes. High-resolution**  
41 **live-imaging analysis revealed that erroneous chromosome segregation**  
42 **occurred in most (90%) spermatocyte-injected oocytes of normal size, but**  
43 **could be ameliorated to 40% in halved oocytes. The birth rate improved**  
44 **remarkably from 1% to 19% ( $P < 0.0001$ ). Importantly, this technique**  
45 **enabled the production of offspring from azoospermic mice with**  
46 **spermatocyte arrest caused by STX2 deficiency, an azoospermia factor**  
47 **also found in humans. Thus, reduced ooplasmic volume can indeed**  
48 **correct the lethal meiotic errors and might help rescue cases of**  
49 **untreatable human azoospermia with spermatocyte arrest. (150 words)**

50

51 **Keywords:** azoospermia; fertilization; meiosis; oocyte; spermatocyte

52

## 53 INTRODUCTION

54 Fertilization is the process whereby female and male gametes (oocytes and  
55 spermatozoa) unite to form a zygote. From the standpoint of their genomes, the  
56 oocyte and spermatozoon are equivalent, but their history and cell type are quite  
57 different. Oocytes acquire their large cytoplasm (the ooplasm) during oogenesis  
58 to store all the components necessary for embryogenesis, including organelles,  
59 proteins, metabolites, mRNAs, and other molecules. By contrast, the  
60 contribution of spermatozoa to zygote formation and embryonic development is  
61 largely limited to deposition of the paternal genome and oocyte activation.  
62 Consequently, simple injection of a spermatozoon or even the sperm head  
63 (nucleus) into a mature oocyte results in normal fertilization, leading to embryo  
64 development and birth of offspring (Ogura et al., 2005; Palermo et al., 1992).  
65 Fertilization of oocytes does not even require mature sperm nuclei, because  
66 injection of nuclei from immature spermatozoa (spermatids) is sufficient for  
67 normal fertilization and embryo development to term (Ogura et al., 2005).  
68 Indeed, in one clinical study, 90 babies were born following round spermatid  
69 injection, without any significant adverse effects (Tanaka et al., 2018).

70         Therefore, a large ooplasm helps determine the embryo's  
71 developmental potential. However, it is known that this feature does not always  
72 provide benefits for development. We and others have shown that a large  
73 ooplasm is linked to error-prone chromosomal segregation, by analyzing  
74 high-resolution images of meiotic chromosomes in oocytes with artificially  
75 increased or decreased ooplasmic volume (Kyogoku and Kitajima, 2017; Lane

76 and Jones, 2017). Thus, the evolution of a particular ooplasmic mass in a  
77 species might have arisen as a delicate trade-off between meiotic fidelity and  
78 post-fertilization developmental competence. In our analysis, it was clear that a  
79 large ooplasm was detrimental, because the meiotic chromosomes showed  
80 frequent abnormal behavior, which could have led to aneuploidy and embryonic  
81 death. Conversely, one can postulate that a smaller ooplasm might be more  
82 beneficial than a larger one in terms of chromosomal behavior, but there is no  
83 evidence for this because intact oocytes undergo meiotic divisions normally  
84 during oogenesis and fertilization in experimentally tractable animal models such  
85 as mice.

86 As mentioned above, normal diploid embryos can be obtained using  
87 spermatids because they are already haploid, as are mature spermatozoa.  
88 However, the use of primary spermatocytes for fertilization is considered to be  
89 ineffective because they are premeiotic germ cells. Theoretically, the  
90 chromosomes of primary spermatocytes might be able to contribute to the  
91 construction of diploid embryos after two meiotic divisions within oocytes.  
92 Indeed, we and another group have reported the birth of mice following  
93 spermatocyte injection into oocytes, but the success rates were low at 1% to 3%  
94 per embryo transferred (Kimura et al., 1998; Ogura et al., 1998). This was mostly  
95 caused by the death of embryos shortly after implantation. When we observed  
96 the reconstructed oocytes at metaphase II (MII), there was a high incidence of  
97 chromosomal aberrations (Miki et al., 2006; Ogura et al., 1998). Since then,  
98 there have been no technical improvements in spermatocyte injection. However,  
99 the use of primary spermatocytes for conception should be explored, given that

100 many cases of nonobstructive azoospermia in humans are associated with  
101 spermatogenic arrest at the primary spermatocyte stage (Enguita-Marruedo et  
102 al., 2019).

103       Based on these findings, we expected that reducing the ooplasmic volume  
104 might improve the chromosomal integrity of spermatocyte-injected oocytes and  
105 increase the survival rate of the resultant embryos. In this study, by employing  
106 high-resolution live-imaging techniques, we analyzed the segregation patterns of  
107 the maternal and paternal chromosomes within spermatocyte-injected oocytes  
108 with or without reduction of the ooplasm. Furthermore, we examined whether  
109 such reduction could improve the birth rate following spermatocyte injection and  
110 whether this technology could be applied to azoospermic mice having a mutation  
111 causing spermatocyte arrest.

## 112 **RESULTS**

### 113 **Reduction of the Recipient Ooplasmic Volume Increases the Rate of** 114 **Normal Diploidy in Spermatocyte-injected Oocytes**

115 Fertilization with primary spermatocytes was achieved by injecting a  
116 spermatocyte nucleus into immature oocytes at the germinal vesicle (GV) stage  
117 followed by arrest at the metaphase of meiosis I (MI) induced by cytochalasin D  
118 treatment (**Figure 1A**). Here, the maternal and paternal (spermatocyte-derived)  
119 chromosomes were synchronized, forming a single chromosomal mass. After  
120 removal of cytochalasin D, they underwent meiotic division with protrusion of the  
121 first polar body to reach the MII stage (**Figure 1A**). This reconstructed MII  
122 “zygote” could be activated artificially to resume meiosis and form a one-cell

123 embryo having one zygotic nucleus (**Figure 1A**). To test the developmental  
124 ability of reconstructed embryos, we transferred these MII chromosomes to  
125 freshly prepared enucleated MII oocytes (Ogura et al., 1998).

126 Recipient oocytes with half the normal ooplasmic volume were prepared by  
127 aspiration using a large glass pipette (**Movie S1**). Using these halved oocytes,  
128 we first analyzed the chromosomal integrity of spermatocyte-injected oocytes. In  
129 control oocytes without spermatocyte injection (i.e., oocyte chromosomes only),  
130 the proportion of oocytes with normal chromosomes was 97% at MII (**Figure 1B**  
131 **and Table S1**). In spermatocyte-injected oocytes with intact ooplasm, the  
132 proportion of normal chromosomes was decreased significantly to 2% (1/59,  $P <$   
133  $0.0001$ ) (**Figure 1B and Table S1**). The most frequent abnormality (86%, 51/58)  
134 was the presence of prematurely separated sister chromatids (**Figure 1B and**  
135 **Table S1**). When spermatocytes were injected into half-sized oocytes, the  
136 proportion of MII oocytes with normal chromosomes improved significantly to  
137 13/62 (21%;  $P < 0.005$ , vs the intact cytoplasm group) because of the decreased  
138 number of separated chromatids (**Figure 1B and Table S1**). Thus, while  
139 chromosomal normality was largely lost during meiosis I in  
140 spermatocyte-injected oocytes, chromosomal aberrations could be prevented in  
141 a significant proportion of oocytes by reduction of the ooplasmic mass.

#### 142 **Reduction of the Recipient Ooplasm Corrects the Behavior of** 143 **Spermatocyte-derived Chromosomes During Meiosis**

144 Next, we sought to study how chromosomal behavior was influenced by the  
145 ooplasmic volume and which of the two parental (maternal or paternal)  
146 chromosomes was more vulnerable to the stress of biparental meiosis. The

147 high-resolution three-dimensional (3D) live imaging system reported in our  
148 previous studies was employed for analyzing the chromosomal behavior during  
149 meiosis I (Kitajima et al., 2011; Kyogoku and Kitajima, 2017). To this end, it was  
150 essential to discriminate the origins of the chromosomes via fluorescence  
151 microscopy. Interestingly, the paternal (spermatocyte-derived) chromosomes  
152 could be distinguished from the maternal chromosomes by the relatively lower  
153 fluorescent intensities of the histone H2B-mCherry marker (**Figure 2A**). Our 3D  
154 visualization of individual chromosomal positions showed that biparental meiosis  
155 exhibited more frequent misalignment of paternal chromosomes at late MI,  
156 compared with the maternal chromosomes (**Figures 2B, C and Movie S2**).  
157 Halving ooplasmic volume significantly reduced the number of misaligned  
158 paternal chromosomes (**Figures 2B, C and Movie S3**), an effect that we  
159 expected based on our previous observations (Kyogoku and Kitajima, 2017).  
160 Thus, paternal chromosomes are susceptible to errors in ooplasm-hosted  
161 biparental meiosis, which can be tuned by reducing the ooplasmic volume.

162 We then analyzed how biparental meiosis in normal-sized ooplasm results  
163 in chromosomal abnormality. Our technique of complete centromere tracking  
164 using 3D imaging (Kitajima et al., 2011; Sakakibara et al., 2015) enabled us to  
165 demonstrate that 89% of biparental meiotic divisions showed errors in  
166 chromosomal segregation at anaphase I (**Figures 2B, 3A and Movie S2**).  
167 Almost all of the errors were of spermatocyte origin (**Figure 3A**). Categorization  
168 of anaphase trajectories showed that predominant error patterns were balanced  
169 and unbalanced predivisions (premature segregation of sister chromatids at MI)



170 (Figure 3B), consistent with our observation of separated chromatids in MII  
171 spreads (Figures 1B and Table S1).

172 Predivisions are error patterns observed following premature separation of  
173 bivalent chromosomes into univalents during the prometaphase and metaphase  
174 in naturally aged oocytes (Sakakibara et al., 2015). Therefore, we carefully  
175 analyzed the prometaphase–metaphase trajectories of the chromosomes that  
176 underwent segregation errors in biparental meiosis. This analysis revealed that  
177 most of the errors were preceded by premature separation of bivalent  
178 chromosomes into univalent-like structures (Figures 2B, 3C and Movies S2,  
179 S3). Importantly, decreasing (halving) the recipient ooplasm mass significantly  
180 suppressed the premature bivalent separation of chromosomes (75% in controls  
181 vs 31% in halved oocytes) (Figure 3D) and chromosome segregation errors  
182 (89% in control vs 46% in halved oocytes) (Figures 3A, B, and D). Thus, the  
183 chromosomal aberrations found in spermatocyte-injected oocytes were largely  
184 attributable to the premature separation of spermatocyte-derived chromosomes,  
185 and about half of such aberrations could be prevented by reducing the size of  
186 the recipient ooplasm (Figure 3E).

### 187 **Reduction in the Recipient Ooplasm Improved the Birth Rates Following** 188 **Spermatocyte Injection**

189 Next, we examined whether reduction of the ooplasm volume could improve the  
190 developmental ability of spermatocyte-derived embryos. When we reconstructed  
191 embryos using normal-sized oocytes and transferred them into recipient  
192 females, only 1% (1/96) developed into offspring (Figure 4A and Table S2),  
193 consistent with our previous reports (Miki et al., 2006; Ogura et al., 1998). By

194 contrast, when we used halved oocytes, 19% (17/90) of the reconstructed  
195 embryos developed into live offspring, achieving a nearly 20-fold improvement  
196 ( $P < 0.0001$ , **Figure 4A and Table S2**). The pups born by this improved method  
197 had body and placental weights within the normal ranges (**Figure S1**). We  
198 allowed three male pups to grow into adults and confirmed that they were all  
199 fertile by mating them with normal female mice.

## 200 **Spermatocyte Injection Rescued Azoospermia Caused by Meiotic Arrest**

201 Finally, we applied this improved spermatocyte injection method to mouse  
202 strains with azoospermia caused by spermatogenic arrest at the primary  
203 spermatocyte stage. If the chromosomes of spermatocytes are functionally and  
204 structurally intact, we surmised that their normal meiotic divisions might be  
205 induced by the meiotic machinery of recipient oocytes. We performed our  
206 studies on *Stx2*<sup>repro34</sup> mice (hereafter, *repro34* mice) that carry a mutation in the  
207 *Stx2* (syntaxin 2) gene induced by *N*-ethyl-*N*-nitrosourea (ENU) mutagenesis  
208 (Fujiwara et al., 2013). Its human homologue, *STX2*, has been identified as a  
209 causal factor of nonobstructive azoospermia (Nakamura et al., 2018). Both  
210 mouse *Stx2* and human *STX2* mutations are characterized by the formation of  
211 large syncytial spermatocytes because of their inability to maintain intercellular  
212 bridges (Fujiwara et al., 2013; Nakamura et al., 2018) (**Figure 4B**). We  
213 confirmed that the nuclei within these syncytial cells of *repro34* mice were  
214 derived from spermatocytes by examining their prophase I chromosomes  
215 following injection into MII oocytes (**Figure 4C**). We reconstructed embryos  
216 using the nuclei collected from these syncytial spermatocytes (**Figure 4D and**  
217 **Movie S4**). After 41 embryos were transferred into recipient females, five pups

218 (four female and one male) were born (**Figure 4E**). All of these pups carried the  
219 point mutation in the *Stx2* gene (**Figure 4F**). We also applied this technique to  
220 spermatocytes from *Exoc1* (exocyst complex component 1)-deficient mice that  
221 also show syncytial spermatocytes (Osawa et al., 2021). Three pups (two female  
222 and one male) carrying the mutation were born at term (**Figure S2**). All the eight  
223 pups derived from *Stx2*- or *Exoc1*-deficient spermatocytes looked normal in  
224 appearance and their body and placental weights were within normal ranges,  
225 except for the body weight of pups from *Stx2*-deficient spermatocytes (**Figure**  
226 **S1**). They grew into normal-looking adults and were proven to be fertile.

## 227 **Chromosomal Analysis of Offspring Born Following Spermatocyte** 228 **Injection**

229 As described above, all the pups born following the injection of wild-type  
230 spermatocytes or mutant spermatocytes grew into fertile adults. We then  
231 analyzed their chromosomal constitution in detail by multicolor fluorescence *in*  
232 *situ* hybridization (FISH). Among the three male mice derived from wild-type  
233 spermatocytes, two had a normal karyotype, but one had XYY sex  
234 chromosomes (**Figure S3**). Among the five mice (four female and one male)  
235 derived from *Stx2*-deficient spermatocytes, two female mice and one male  
236 mouse were normal, but one female had an XO chromosome and another had a  
237 shortened X chromosome (**Figure S4**). Among the three female mice derived  
238 from *Exoc1*-deficient spermatocytes, one had an XO chromosomal  
239 configuration. No abnormalities were found in the autosomes of the mice  
240 examined.

## 241 **DISCUSSION**

242 Here, we addressed whether reducing the recipient ooplasm could ameliorate  
243 the embryonic death rate caused by the meiotic errors that can occur in  
244 mammalian oocytes. To this end, we employed an assisted fertilization system  
245 using primary spermatocytes, which need simultaneous biparental meiosis  
246 within oocytes: namely, meiosis with doubled chromosomes. Following  
247 spermatocyte injection into halved oocytes, the proportion of normal  
248 chromosomes at MII increased from 2% to 21% and the birth rate increased from  
249 1% to 19%. These results demonstrate unequivocally that reducing the mass of  
250 the ooplasm indeed helps to normalize chromosomal behavior, leading to better  
251 survival of embryos to term. It would be interesting to test whether this strategy  
252 could also correct the meiotic errors that are frequently found in oocytes from  
253 aged female mammals (Mihajlović and FitzHarris, 2018). In humans, these  
254 meiotic errors in oocytes are known to increase with advanced age and to  
255 reduce conception rates significantly (El Yakoubi and Wassmann 2017; Mikwar  
256 et al., 2020). In these errors, diverse mechanistic defects are involved, such as  
257 defects in chromosomal cross-over formation, cohesin loss and spindle  
258 deformation (Ma et al., 2020; Mihajlović and FitzHarris, 2018). We suspect that  
259 reducing the mass of the ooplasm might help rescue or prevent at least some of  
260 these defects.

261 The nearly 20-fold improvement in the birth rate following spermatocyte  
262 injection into halved oocytes was much better than we expected. It is known that  
263 meiosis in female and male mammals differs largely with respect to the

264 underlying molecular mechanisms and cell cycle progression patterns, such as  
265 absence of the interphase between two meiotic divisions in female germ cells.  
266 Consistent with this, many strains of gene knockout mice carrying mutations of  
267 meiosis-related factors show male or female infertility (Biswas et al., 2021;  
268 Jamsai and O'Bryan, 2011). Our findings imply that the meiotic chromosomes of  
269 female and male germ cells have structural commonalities that allow  
270 mechanistic interchangeability between them. Nevertheless, most chromosomal  
271 aberrations were identified as of spermatocyte origin with a high incidence of  
272 premature sister chromatid segregation during meiosis I. Most of these errors  
273 were preceded by premature separation of bivalent chromosomes into  
274 univalent-like structures. Our results reveal a novel effect of ooplasmic reduction  
275 that can suppress premature separation of chromosomes, at least in the context  
276 of biparental meiosis. These suggest that spermatocyte-derived chromosomes  
277 are more vulnerable to physical or biochemical properties associated with a  
278 large ooplasm, such as spindle size, and ooplasmic dilution of nuclear factors  
279 (Kyogoku and Kitajima, 2017). The delayed alignment of spermatocyte-derived  
280 chromosomes to the MI spindle (**Figures 2B and C**) might also reflect these  
281 differences. In other words, maternal meiotic chromosomes might have evolved  
282 special mechanisms that efficiently avoid segregation errors in a large ooplasm.

283 Chromosomal analysis by multicolor FISH revealed that four of the 11  
284 spermatocyte-derived offspring carried chromosomal abnormalities that were  
285 restricted to the sex chromosomes. There were no abnormalities in autosomes  
286 in any of the mice analyzed. This sex-chromosome-biased chromosomal  
287 aberration may be explained by the high embryonic lethality of autosomal

288 aneuploidy, which might have selected embryos with normal autosomes for  
289 survival to term. It might also have resulted from yet undiscovered special  
290 characteristics of sex chromosomes, especially those derived from  
291 spermatocytes. All the abnormal patterns found in the sex chromosomes—XO,  
292 XX with a shortened X, and XYY—can be explained by segregation errors of  
293 spermatocyte XY chromosomes during meiosis I (see **Figures 3B and E**). It is  
294 known that sex chromosomes are prepared to undergo meiosis later than  
295 autosomes as they require the formation of the XY body (Kauppi et al., 2011).  
296 Therefore, it is possible that spermatocytes that had not completed this stage  
297 might have been selected for injection accidentally.

298         This study has practical implications for treating spermatogenic arrest  
299 caused by meiotic arrest. Given the complexity of meiosis, many genes are  
300 involved in its regulation, as revealed by mouse gene knockout models (Jamsai  
301 and O'Bryan, 2011). Defects in some of these genes might cause failure of  
302 meiosis and spermatogenic arrest at the primary spermatocyte stage. The  
303 results of this study will help identify the types of meiotic arrest that can be  
304 rescued or prevented by the spermatocyte injection technique we developed  
305 here. Such information would provide invaluable clues for human clinical  
306 research aiming to develop treatments for meiosis-related male infertility. In  
307 addition, we propose another important implication of this study: at present,  
308 complete *in vitro* gametogenesis is possible for female germ cells (Hikabe et al.,  
309 2016), but not for male germ cells. One of the major causes of this sex-specific  
310 difference in *in vitro* gametogenesis is the inability of male germ cells to undergo  
311 meiosis *in vitro*. If male primordial germ cell-like cells derived from induced

312 pluripotent stem cells (Hayashi et al., 2011) could be cultured to form pachytene  
313 spermatocytes, injecting them into immature oocytes as substitute gametes  
314 might produce offspring by skipping *in vivo* male gametogenesis completely.  
315 This could be the ultimate strategy to enable conception in cases of male  
316 patients with germ cell loss. These scenarios could open up new methods for  
317 treating human male infertility, although there are a number of ethical and  
318 technical issues—for example, the high incidence of sex chromosome  
319 abnormalities—that need to be resolved before these strategies could be used  
320 by clinics offering assisted reproductive technology.

321

322

## 323 **EXPERIMENTAL MODEL AND SUBJECT DETAILS**

324

### 325 **Mice**

326 All animal experiments were approved by and performed according to the  
327 principles of the Institutional Animal Care and Use Committees at RIKEN,  
328 Tsukuba and Kobe Branches. B6D2F1 and C57BL/6NCrSlc mice were  
329 purchased from Japan SLC. ICR mice were purchased from CLEA, Japan.  
330 *Repro 34* mice carrying the *Stx*<sup>*repro34*</sup> mutation were introduced from Okayama  
331 University. The *repro34* mutation was induced in a C57BL/6J male and  
332 subsequently a congenic line with the C3HeB/FeJ background was created  
333 (Akiyama et al., 2008). Germline-specific *Exoc1* conditional knockout mice were  
334 generated by breeding *Exoc1*<sup>*tm1c(EUCOMM)Hmgu*</sup> mice (Skarnes et al., 2011) with

335 *Nanos3*-Cre driver mice (kindly gifted by Dr Y. Saga, RIKEN BRC RBRC02568),  
336 which express Cre in spermatogonia (Osawa et al., 2021; Suzuki et al., 2008).

337

### 338 **Collection of oocytes**

339 Female B6D2F1 mice (9–12 weeks old) were injected with 7.5 IU of equine  
340 chorionic gonadotropin (eCG, ASKA Pharmaceutical, Tokyo, Japan). Forty-four  
341 to forty-eight hours after injection, fully grown oocytes at the GV stage were  
342 collected from large antral follicles and released into M2 medium supplemented  
343 with 150 µg/ml dibutyryl cyclic (dbc) AMP (Merck KGaA). After being freed from  
344 cumulus cells by pipetting, oocytes were cultured for at least 1 hours in MEM  
345 Merck KGaA) supplemented with 50 µg/mL gentamicin, 0.22 mM Na-pyruvate, 1  
346 µg/ml epidermal growth factor (EGF), 150 µg/ml dbc AMP, and 4 mg/ml bovine  
347 serum albumin (BSA), (mMEM) (Fulka and Langerova, 2014) at 37°C in an  
348 atmosphere of 5% CO<sub>2</sub> in humidified air, until micromanipulation.

349

### 350 **Collection of primary spermatocytes**

351 Spermatogenic cells were collected from the testes of male B6D2F1, C57BL/6N,  
352 and ICR mice (12–16 weeks old) by a mechanical method as reported in a  
353 previous study (Ogura and Yanagimachi, 1993). Briefly, the testes were placed  
354 in erythrocyte-lysing buffer (155 mM NH<sub>4</sub>Cl, 10 mM KHCO<sub>3</sub>, 2 mM EDTA; pH  
355 7.2). After the tunica albuginea had been removed, the testes were transferred  
356 into a cold (4°C) Dulbecco's phosphate-buffered saline (PBS) supplemented  
357 with 5.6 mM glucose, 5.4 mM sodium lactate, and 3 mg/ml BSA (GL-PBS)  
358 (Ogura et al., 1996). The seminiferous tubules were cut into small pieces using a



359 pair of fine scissors and pipetted gently to allow spermatogenic cells to be  
360 released into the medium. The cell suspension was filtered through a 38- $\mu$ m  
361 nylon mesh and washed twice by centrifugation (200g for 4 min). After gentle  
362 washing, the cells were resuspended in GL-PBS and stored at 4°C until  
363 microinjection.

364

## 365 **METHODS DETAILS**

### 366 **Micromanipulation**

367 To make half-sized oocytes, oocytes at the GV stage were transferred to M2  
368 medium (Merck Millipore) containing 7.5  $\mu$ g/ml cytochalasin D (Merck KGaA)  
369 and 60 mM NaCl for 10 min at 37°C. All manipulations were performed under an  
370 inverted microscope with a Piezo-driven micromanipulator (PrimeTech). The  
371 zona pellucida was opened by piezo drilling and one-third to half of the  
372 ooplasmic volume was aspirated with an injection pipette (inner diameter 25  $\mu$ m)  
373 at 37°C (**Movie S1**). After manipulation, oocytes were cultured in mMEM  
374 containing 7.5  $\mu$ g/ml cytochalasin D and 40 mM NaCl at 37°C in an atmosphere  
375 of 5% CO<sub>2</sub> in air. About 1–1.5 hours later, primary spermatocytes (pachytene to  
376 diplotene stages) were injected into oocytes that were induced to arrest at the MI  
377 stage by cytochalasin D. Oocytes were cultured in mMEM containing 7.5  $\mu$ g/ml  
378 cytochalasin D and 40 mM NaCl for 2 hours at 37°C in an atmosphere of 5%  
379 CO<sub>2</sub> in humidified air. After washing in mMEM, the oocytes were cultured for 14–  
380 17 hours until they reached the MII stage. The karyoplasts containing  
381 chromosomes were removed and were then fused with fresh enucleated oocytes  
382 using Sendai virus (HVJ; Ishihara Sangyo Co., Ltd.) in HEPES-buffered CZB

383 medium (Chatot et al., 1990) containing 7.5  $\mu\text{g}/\text{mL}$  cytochalasin B. After  
384 manipulation, the oocytes were cultured in CZB medium containing 7.5  $\mu\text{g}/\text{mL}$   
385 cytochalasin B for 1 hours at 37°C in an atmosphere of 5%  $\text{CO}_2$  in humidified air  
386 until complete fusion occurred. Reconstructed oocytes were activated by  
387 culturing them in  $\text{Ca}^{2+}$ -free CZB medium containing 8 mM  $\text{SrCl}_2$  for 20 min. After  
388 washing, the oocytes were cultured in CZB medium for 24 hours under 5%  $\text{CO}_2$   
389 in humidified air at 37°C.

390

### 391 **Embryo Transfer**

392 Embryos that reached the 2-cell stage by 24 hours were transferred into the  
393 oviducts of Day 1 pseudopregnant ICR strain female mice (9–12 weeks old). On  
394 day 19.5, recipient females were euthanized and their uteri were examined for  
395 live fetuses. In some experiments, live fetuses were nursed by lactating foster  
396 ICR strain mothers. After weaning, they were checked for fertility by mating with  
397 ICR mice of the opposite sex.

398

### 399 **Chromosome preparation of oocytes**

400 The MII oocytes were treated with 0.5% actinase E (Kaken Pharmaceutical Co.)  
401 for 5 min at room temperature to loosen the zona pellucida and then treated with  
402 a hypotonic solution (1:1 mixture of 1.2% sodium citrate and 60% fetal bovine  
403 serum, FBS; Merck KGaA) for 10 min at room temperature. Chromosome slides  
404 were prepared using a gradual-fixation/air-drying method (Mikamo and  
405 Kamiguchi, 1983). Briefly, oocytes were treated with Fixative I (methanol:acetic  
406 acid:distilled water = 5:1:4) for 6–8 min and put onto a glass slide with a small

407 amount of Fixative I. Then, the oocytes were treated with Fixative II  
408 (methanol:acetic acid = 3:1) for 2 min, followed by treatment with Fixative III  
409 (methanol:acetic acid:distilled water = 3:3:1) for 1 min. The slides were air-dried  
410 under conditions of 50%–60% humidity at 22–24°C. For conventional  
411 chromosome analysis, the slides were stained with 2% Giemsa (Merck KGaA)  
412 for 8 min. C-band staining was used to distinguish between structural  
413 chromosome aberrations and aneuploidy (Tateno and Kamiguchi, 2007).

414

415 **Chromosome analysis by multicolor fluorescence *in situ* hybridization**  
416 **(FISH)**

417 Spleens were removed under sterile conditions from mice produced by  
418 spermatocyte injection. Lymphocytes were isolated from the spleen and  
419 incubated in a tissue culture tube at a cell concentration of  $1 \times 10^6$ /ml in  
420 RPMI1640 (Nacalai Tesque) containing lipopolysaccharide (10  $\mu$ g/ml, Merck  
421 KGaA), concanavalin A (3  $\mu$ g/ml, Nacalai Tesque), 2-mercaptoethanol (50  $\mu$ M,  
422 Nacalai Tesque), and FBS (6%) at 37°C under 5% CO<sub>2</sub> in humidified air for 48  
423 hours. Colcemid (KaryoMAX, Gibco) at a concentration of 0.02  $\mu$ g/ml was added  
424 to the cell suspension for the last 2 hours of culture to arrest the cell cycle at  
425 metaphase. The cells were centrifuged at 420g for 5 min and resuspended in 3  
426 ml of a hypotonic solution (0.075 M KCl). Twenty minutes later, 2 ml of Carnoy's  
427 fixative (methanol:acetic acid = 3:1) was added to the cell suspension. Cells  
428 were centrifuged at 420g for 5 min and resuspended in 5 ml of fresh Carnoy's  
429 fixative. Centrifugations and fixations were repeated three times. Chromosome  
430 preparations were made using a Hanabi metaphase spreader (ADSTEC). For

431 multicolor FISH analysis, the chromosome slides were hybridized with  
432 21XMouse (MetaSystems) according to the manufacturer's protocol. For  
433 denaturation of chromosomal DNA, the slides were incubated in 2 × saline  
434 sodium buffer (SSC) at 70°C for 30 min and then treated with 0.07 M NaOH at  
435 room temperature for 1 min. The denatured slides were washed in 0.1 × SSC  
436 and 2 × SSC at 4 °C for 1 min each and dehydrated with a series of 70%, 95%,  
437 and 100% ethanol. Multicolor FISH probes were denatured at 75°C for 5 min and  
438 applied to the chromosome slides. After hybridization at 37°C for 48 hours in a  
439 humidified chamber, the chromosome slides were treated with 0.4 × SSC at  
440 72°C for 2 min, washed in 2 × SSC with 0.05% Tween20 (Merck KGaA) at room  
441 temperature for 30 seconds, and rinsed in distilled water. For counterstaining,  
442 the slides were covered by a coverslip with DAPI/Antifade (MetaSystems). The  
443 chromosome slides were observed using fluorescent microscopy. Fluorescence  
444 images were captured using a high-sensitive digital camera ( $\alpha$ 7s, SONY). The  
445 images were imported into the ChromaWizard software (Auer et al., 2018) to  
446 assign fluorescence colors to each chromosome. Based on these fluorescence  
447 colors, the chromosome numbering was determined. Ten metaphase cells per  
448 mouse were analyzed for karyotyping.

449

#### 450 **Chromosome analysis by Giemsa banding (G-banding)**

451 When multicolor FISH analysis revealed a possible chromosome deletion,  
452 additional G-band staining was performed to identify the lost part of the  
453 chromosomes. The chromosome slides were treated with 0.025% trypsin  
454 (FUJIFILM Wako Pure Chemical Corporation) for 2 min at room temperature,

455 washed in PBS, and stained with 4% Giemsa for 8 min. Deletion sites were  
456 determined according to the band pattern nomenclature of mouse chromosomes  
457 (Nesbitt and Francke, 1973).

458

### 459 **Live cell imaging**

460 After linearization of the template plasmids, mRNA was synthesized using the  
461 mMESAGE mMACHINE KIT (Ambion). The synthesized RNAs were stored at  
462  $-80^{\circ}\text{C}$  until use. The *in vitro*-transcribed mRNAs (1.2  $\mu\text{l}$  of 650  $\text{ng}/\mu\text{l}$  major  
463 satellite-mClover (Miyanari et al., 2013) and 0.6  $\mu\text{l}$  of 350  $\text{ng}/\mu\text{l}$  H2B-mCherry)  
464 were microinjected into oocytes. These were cultured for 1 hours and then  
465 subjected to micromanipulation. Live cell imaging was performed as described  
466 (Kitajima et al., 2011; Sakakibara et al., 2015), with some modifications. Briefly,  
467 a Zeiss LSM710 or LSM880 confocal microscope equipped with a 40  $\times$   
468 C-Apochromat 1.2NA water immersion objective lens (Carl Zeiss) was controlled  
469 by a multi-position autofocus macro (Politi et al., 2018). For centromere tracking  
470 (**Figure 3**), 19 confocal z-sections (every 1.5  $\mu\text{m}$ ) of 512  $\times$  512 pixel x/y images  
471 covering a total volume of 35.4  $\times$  35.4  $\times$  28.5  $\mu\text{m}$  were acquired at 200-second  
472 intervals for at least 10 hours after spermatocyte injection into oocytes  
473 expressing major satellite-mClover and H2B-mCherry. Centromere tracking was  
474 performed as described (Kitajima et al., 2011; Sakakibara et al., 2015). The  
475 parental origin of chromosomes was identified by the intensities of the  
476 chromosomes and the centromeres (lower fluorescent intensity for the  
477 spermatocyte chromosomes) (**Figure S2A**).

478

479 **Statistical analysis**

480 The rates of chromosomal abnormalities and embryo development were  
481 evaluated using Fisher's exact probability test. The body and placental weights  
482 of pups were evaluated using Student's *t*-test.

483

484 **SUPPLEMENTAL INFORMATION**

485 Supplemental information can be found at ..

486 **ACKNOWLEDGMENTS**

487 This study was supported by KAKENHI Grant Numbers 23500507 (N.O.),  
488 JP19H05758 (A.O. and T.H.), 20H05376 (H.K.), and 18H05549 (T.S.K.).

489 **AUTHOR CONTRIBUTIONS**

490 N.O. and A.O. conceived the project. The project was developed jointly by A.O.,  
491 T.K., S.M., H.T., T.S.K., and F.S. Experiments were carried out by N.O., T.H.,  
492 H.K., Y.O., Y.F., and K.I. The paper was written by N.O., T.H., H.K., T.S.K., and  
493 A.O.

494 **DECLARATION OF INTERESTS**

495 The authors declare no competing interests.

496

497 **REFERENCES**

- 498 Akiyama, K., Akimaru, S., Asano, Y., Khalaj, M., Kiyosu, C., Masoudi, A.A.,  
499 Takahashi, S., Katayama, K., Tsuji, T., Noguchi, J., and Kunieda, T. (2008). A  
500 New ENU-Induced Mutant Mouse with Defective Spermatogenesis Caused by a  
501 Nonsense Mutation of the Syntaxin 2/Epimorphin (*Stx2/Epim*) Gene. *J.*  
502 *Reprod.Dev.* *58*, 122-128.
- 503 Auer, N., Hrdina, A., Hiremath, C., Vcelar, S., Baumann, M., Borth, N., and  
504 Jadhav, V. (2018). ChromaWizard: An open source image analysis software for  
505 multicolor fluorescence in situ hybridization analysis. *Cytometry. Part A : the*  
506 *journal of the International Society for Analytical Cytology* *93*, 749-754.
- 507 Biswas, L., Tyc, K., El Yakoubi, W., Morgan, K., Xing, J., and Schindler, K.  
508 (2021). Meiosis interrupted: the genetics of female infertility via meiotic failure.  
509 *Reproduction* *161*, R13-r35.
- 510 Chatot, C.L., Lewis, J.L., Torres, I., and Ziomek, C.A. (1990). Development of  
511 1-cell embryos from different strains of mice in CZB medium. *Biol. Reprod.* *42*,  
512 432-440.
- 513 El Yakoubi, W., and Wassmann, K. (2017) Meiotic divisions: No place for gender  
514 equality. *Adv. Exp. Med. Biol.* *1002*, 1-17.
- 515 Enguita-Marruedo, A., Sleddens-Linkels, E., Ooms, M., de Geus, V., Wilke, M.,  
516 Blom, E., Dohle, G.R., Looijenga, L.H.J., van Cappellen, W., Baart, E.B., and  
517 Baarends, W.M. (2019). Meiotic arrest occurs most frequently at metaphase and  
518 is often incomplete in azoospermic men. *Fertil. Steril.* *112*, 1059-1070.
- 519 Fujiwara, Y., Ogonuki, N., Inoue, K., Ogura, A., Handel, M.A., Noguchi, J., and  
520 Kunieda, T. (2013). t-SNARE Syntaxin2 (STX2) is implicated in intracellular  
521 transport of sulfoglycolipids during meiotic prophase in mouse spermatogenesis.  
522 *Biol. Reprod.* *88*, 141.

- 523 Fulka, H., and Langerova, A. (2014). The maternal nucleolus plays a key role in  
524 centromere satellite maintenance during the oocyte to embryo transition.  
525 *Development* *141*, 1694-1704.
- 526 Hayashi, K., Ohta, H., Kurimoto, K., Aramaki, S., and Saitou, M. (2011).  
527 Reconstitution of the mouse germ cell specification pathway in culture by  
528 pluripotent stem cells. *Cell* *146*, 519-532.
- 529 Hikabe, O., Hamazaki, N., Nagamatsu, G., Obata, Y., Hirao, Y., Hamada, N.,  
530 Shimamoto, S., Imamura, T., Nakashima, K., Saitou, M., and Hayashi, K. (2016).  
531 Reconstitution in vitro of the entire cycle of the mouse female germ line. *Nature*  
532 *539*, 299-303.
- 533 Jamsai, D., and O'Bryan, M.K. (2011). Mouse models in male fertility research.  
534 *AsianJ. Androl.* *13*, 139-151.
- 535 Kauppi, L., Barchi, M., Baudat, F., Romanienko, P.J., Keeney, S., and Jasin, M.  
536 (2011). Distinct properties of the XY pseudoautosomal region crucial for male  
537 meiosis. *Science* *331*, 916-920.
- 538 Kimura, Y., Tateno, H., Handel, M.A., and Yanagimachi, R. (1998). Factors  
539 affecting meiotic and developmental competence of primary spermatocyte nuclei  
540 injected into mouse oocytes. *Biol. Reprod.* *59*, 871-877.
- 541 Kitajima, T.S., Ohsugi, M., and Ellenberg, J. (2011). Complete kinetochore  
542 tracking reveals error-prone homologous chromosome biorientation in  
543 mammalian oocytes. *Cell* *146*, 568-581.
- 544 Kyogoku, H., and Kitajima, T.S. (2017). Large Cytoplasm Is Linked to the  
545 Error-Prone Nature of Oocytes. *Dev. Cell* *41*, 287-298.
- 546 Lane, S.I.R., and Jones, K.T. (2017). Chromosome biorientation and APC  
547 activity remain uncoupled in oocytes with reduced volume. *J. Cell Biol.* *216*,  
548 3949-3957.



- 549 Ma, J.Y., Li, S., Chen, L.N., Schatten, H., Ou, X.H., and Sun, Q.Y. (2020). Why is  
550 oocyte aneuploidy increased with maternal aging? *J. Genet. Genomics* 47,  
551 659-671.
- 552 Mihajlović A.I., and FitzHarris, G. (2018) Segregating chromosomes in the  
553 mammalian oocyte. *Curr. Biol.* 28, R895-R907.
- 554 Mikamo, K., and Kamiguchi, Y. (1983). A new assessment system for  
555 chromosomal mutagenicity using chinese hamster oocytes and early zygotes. *J.*  
556 *Toxicol.Sci.* 8, 316.
- 557 Miki, H., Ogonuki, N., Inoue, K., Baba, T., and Ogura, A. (2006). Improvement of  
558 cumulus-free oocyte maturation in vitro and its application to microinsemination  
559 with primary spermatocytes in mice. *J. Reprod. Dev.* 52, 239-248.
- 560 Mikwar, M., MacFarlane, A.J., Marchetti, F. Mechanisms of oocyte aneuploidy  
561 associated with advanced maternal age. (2020) *Mutat. Res. Rev. Mutat. Res.*  
562 785, 108320.
- 563 Miyanari, Y., Ziegler-Birling, C., and Torres-Padilla, M.E. (2013). Live  
564 visualization of chromatin dynamics with fluorescent TALEs. *Nat. Struct. Mol.*  
565 *Biol.* 20, 1321-1324.
- 566 Nakamura, S., Kobori, Y., Ueda, Y., Tanaka, Y., Ishikawa, H., Yoshida, A.,  
567 Katsumi, M., Saito, K., Nakamura, A., Ogata, T., et al. (2018). STX2 is a  
568 causative gene for nonobstructive azoospermia. *Hum. Mutat.* 39, 830-833.
- 569 Nesbitt, M.N., and Francke, U. (1973). A system of nomenclature for band  
570 patterns of mouse chromosomes. *Chromosoma* 41, 145-158.
- 571 Ogura, A., Matsuda, J., Asano, T., Suzuki, O., and Yanagimachi, R. (1996).  
572 Mouse oocytes injected with cryopreserved round spermatids can develop into  
573 normal offspring. *J. Assist. Reprod. Genet.* 13, 431-434.
- 574 Ogura, A., Ogonuki, N., Miki, H., and Inoue, K. (2005). Microinsemination and  
575 nuclear transfer using male germ cells. *Int. Rev. Cytol.* 246, 189-229.

- 576 Ogura, A., Suzuki, O., Tanemura, K., Mochida, K., Kobayashi, Y., and Matsuda,  
577 J. (1998). Development of normal mice from metaphase I oocytes fertilized with  
578 primary spermatocytes. *Proc. Nat. Acad. Sci. USA* **95**, 5611-5615.
- 579 Ogura, A., and Yanagimachi, R. (1993). Round spermatid nuclei injected into  
580 hamster oocytes form pronuclei and participate in syngamy. *Biol.Reprod.* **48**,  
581 219-225.
- 582 Osawa, Y., Murata, K., Usui, M., Kuba, Y., Le, H.T., Mikami, N., Nakagawa, T.,  
583 Daitoku, Y., Kato, K., Shawki, H.H., et al. (2021). EXOC1 plays an integral role in  
584 spermatogonia pseudopod elongation and spermatocyte stable syncytium  
585 formation in mice. *eLife* **10**.
- 586 Palermo, G., Joris, H., Devroey, P., and Van Steirteghem, A.C. (1992).  
587 Pregnancies after intracytoplasmic injection of single spermatozoon into an  
588 oocyte. *Lancet* **340**, 17-18.
- 589 Politi, A.Z., Cai, Y., Walther, N., Hossain, M.J., Koch, B., Wachsmuth, M., and  
590 Ellenberg, J. (2018). Quantitative mapping of fluorescently tagged cellular  
591 proteins using FCS-calibrated four-dimensional imaging. *Nat. Protoc.* **13**,  
592 1445-1464.
- 593 Sakakibara, Y., Hashimoto, S., Nakaoka, Y., Kouznetsova, A., Höög, C., and  
594 Kitajima, T.S. (2015). Bivalent separation into univalents precedes age-related  
595 meiosis I errors in oocytes. *Nat. Commun.* **6**, 7550.
- 596 Skarnes, W.C., Rosen, B., West, A.P., Koutsourakis, M., Bushell, W., Iyer, V.,  
597 Mujica, A.O., Thomas, M., Harrow, J., Cox, T., et al. (2011). A conditional  
598 knockout resource for the genome-wide study of mouse gene function. *Nature*  
599 **474**, 337-342.
- 600 Suzuki, H., Tsuda, M., Kiso, M., and Saga, Y. (2008). Nanos3 maintains the germ  
601 cell lineage in the mouse by suppressing both Bax-dependent and -independent  
602 apoptotic pathways. *Dev. Biol.* **318**, 133-142.

603 Tanaka, A., Suzuki, K., Nagayoshi, M., Tanaka, A., Takemoto, Y., Watanabe, S.,  
604 Takeda, S., Irahara, M., Kuji, N., Yamagata, Z., and Yanagimachi, R. (2018).  
605 Ninety babies born after round spermatid injection into oocytes: survey of their  
606 development from fertilization to 2 years of age. *Fertil. Steril.* *110*, 443-451.

607 Tateno, H., and Kamiguchi, Y. (2007). Evaluation of chromosomal risk following  
608 intracytoplasmic sperm injection in the mouse. *Biol.Reprod.* *77*, 336-342.

609  
610

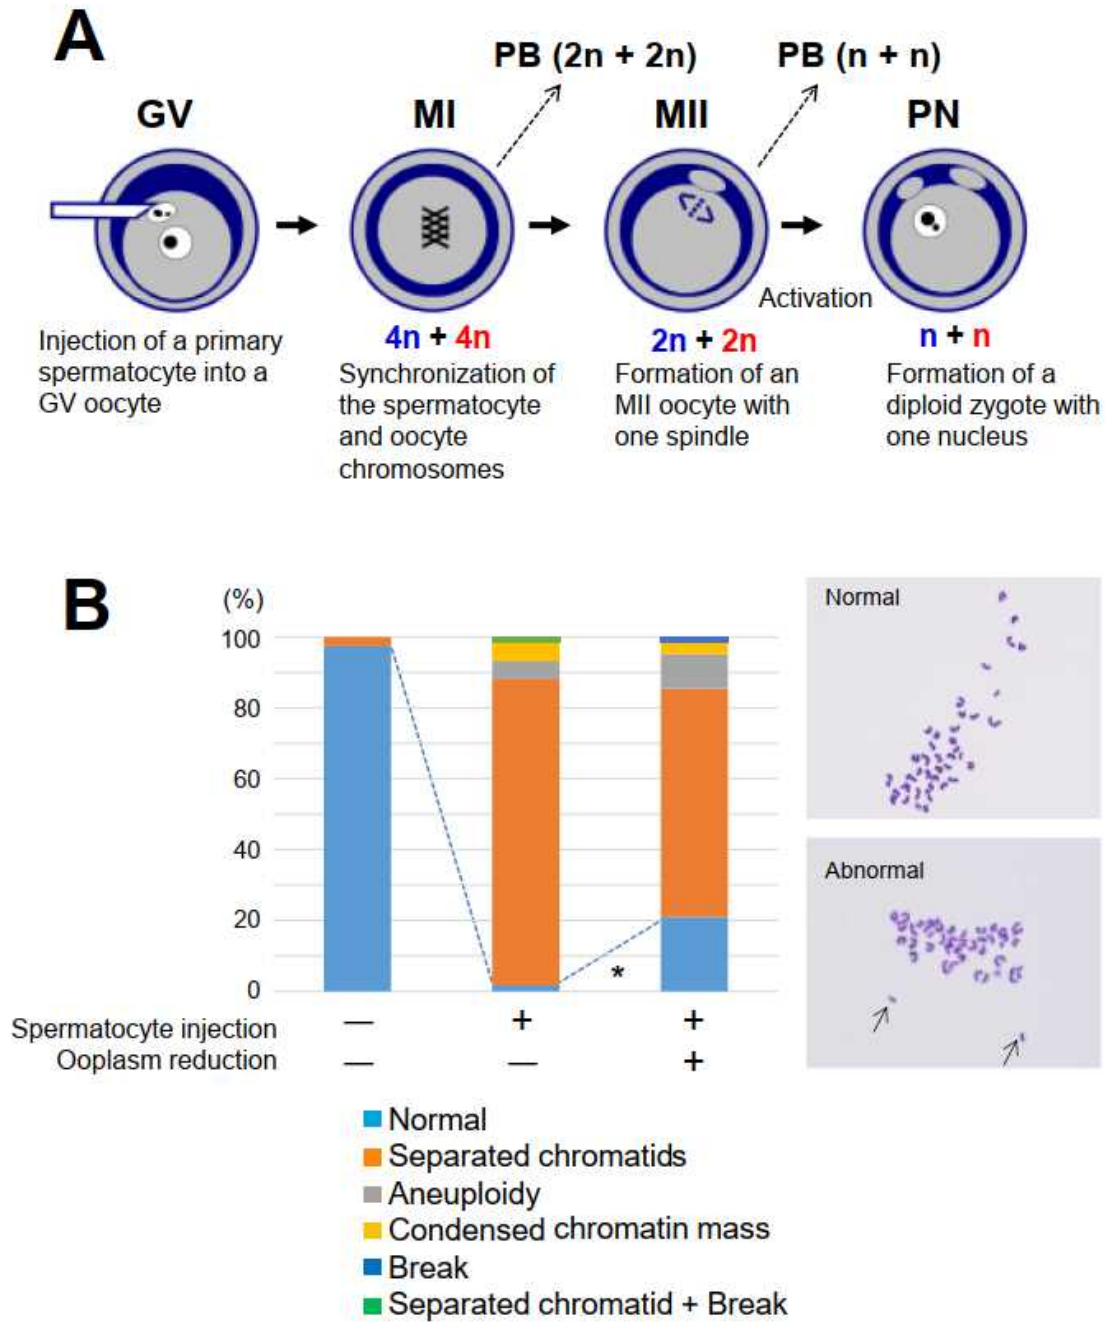

611

612

613

614 **Figure 1. Fertilization with Primary Spermatocytes**

615 (A) The scheme of construction of a diploid fertilized oocyte using a primary  
616 spermatocyte and a GV-stage oocyte. The chromosomes of the spermatocyte  
617 and the oocyte are intermingled at MI to form a single chromosomal mass.

618 (B) Chromosomal analysis of MII oocytes that had been injected with primary  
619 spermatocytes. In the spermatocyte-injected groups, normality was improved by  
620 reducing the ooplasm mass ( $*P < 0.005$  by Fisher's exact probability test).

621 Arrows in the right figure indicate prematurely separated chromatids. For the  
622 exact numbers in each case, see also **Table S1**. PB, polar body; GV, germinal  
623 vesicle; MI, meiosis I; PN, pronuclear stage.

624

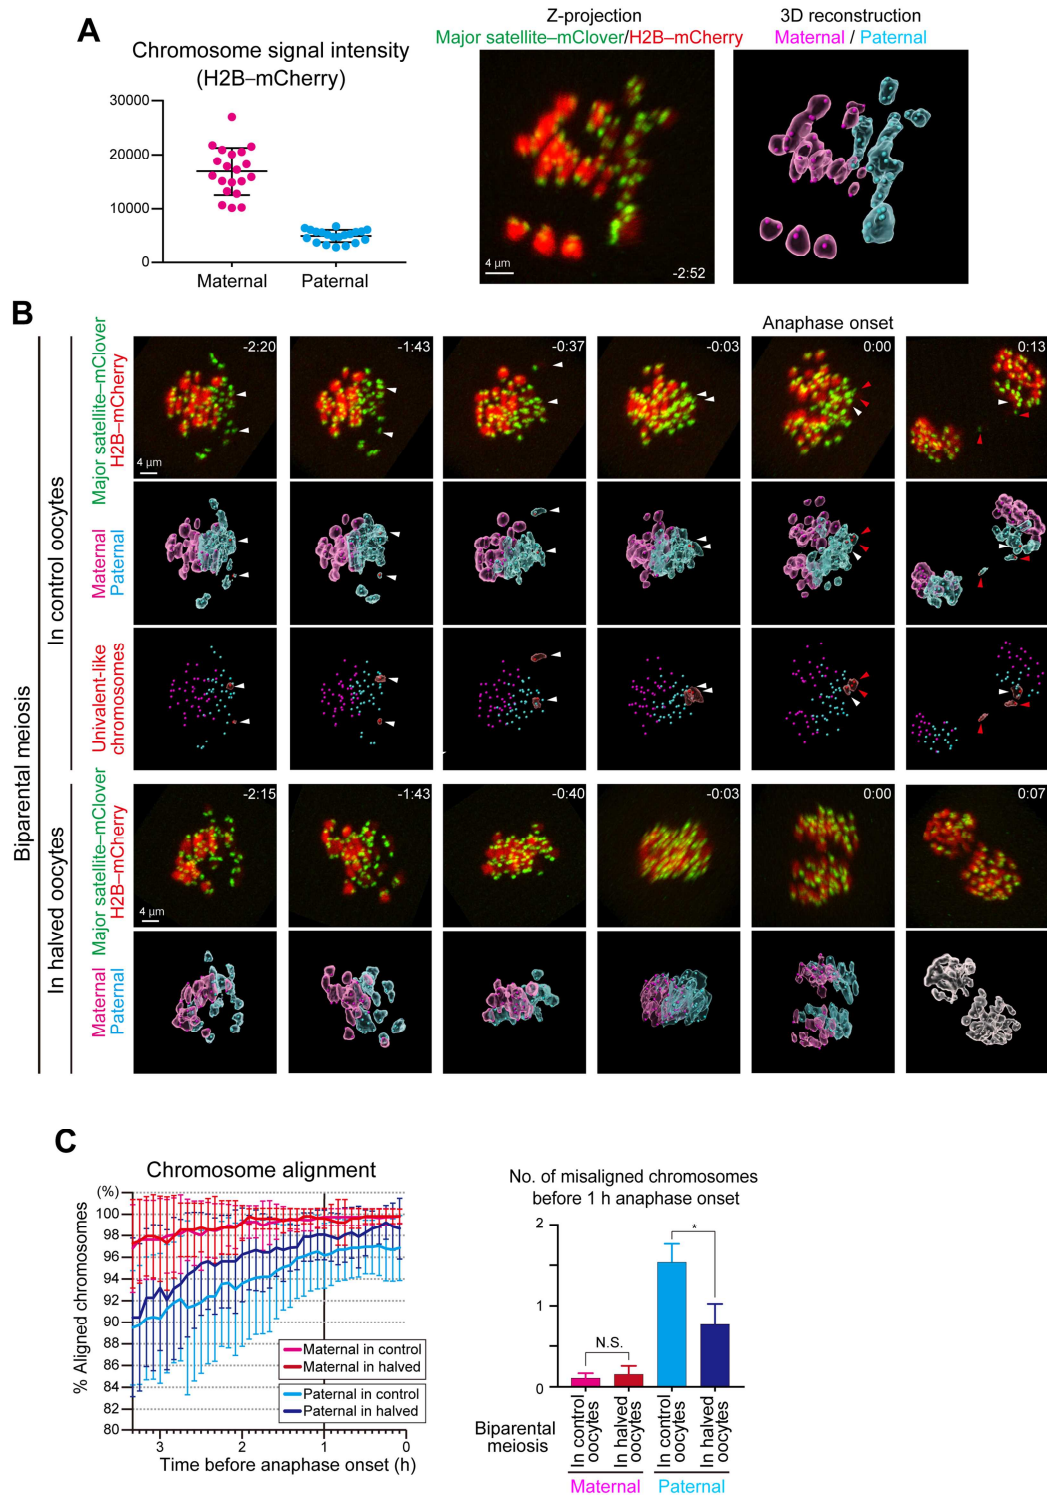

625

626

627 **Figure 2. Live Imaging of Biparental Meiosis**

628 (A) Identification of parental origin of the chromosomes was distinguishable  
629 based on H2B-mCherry fluorescent intensities (paternal chromosomes exhibit  
630 lower intensities). The z-projection image shows major satellite-mClover  
631 (centromeres, green) and H2B-mCherry (chromosomes, red). Time from  
632 anaphase onset is shown in h:min. Scale bar = 4  $\mu$ m. The 3D-reconstructed  
633 image shows maternal (magenta) and paternal (cyan) chromosomes. Spots  
634 indicate centromeres.

635 (B) Chromosome tracking in 3D. The reconstructed images are viewed from the  
636 side of the metaphase plate. Signals are interpolated in the Z axis for  
637 visualization. White and red arrowheads, as well as red surfaces, indicate  
638 univalent-like chromosomes that underwent unbalanced predivision (premature  
639 segregation of sister chromatids). Scale bar = 4  $\mu$ m.

640 (C) Halving the recipient ooplasmic mass rescued chromosome alignment. The  
641 numbers of misaligned chromosomes and their parental origin were determined  
642 in 3D ( $n = 39$  and  $17$  oocytes). Error bars show the standard deviation. Student's  
643  $t$  test was used to compare means.  $*P < 0.05$ . N.S., not significant.

644

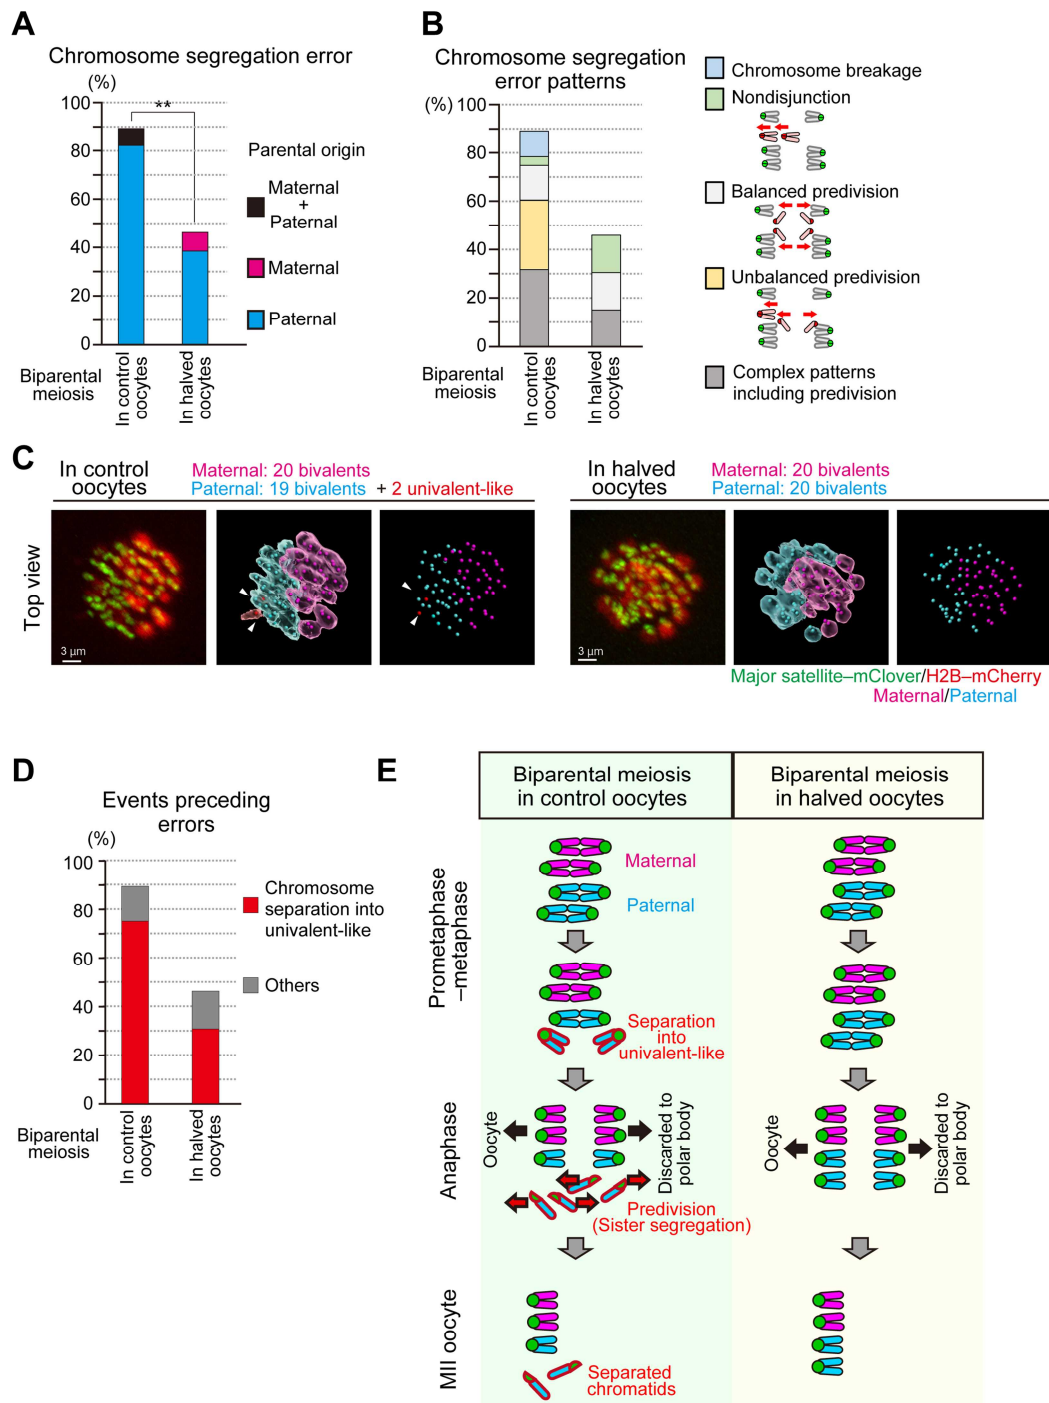

645

646



647 **Figure 3. Halving the Recipient Ooplasm Prevents Premature Separation of**  
648 **Paternal Chromosomes in Biparental Meiosis**

649 (A) Halving the recipient ooplasm mass reduced chromosome segregation  
650 errors. Errors were determined by tracking all chromosomes at anaphase ( $n = 39$   
651 and 17 oocytes) (See also [Figure 2B](#)). The parental origin of errors is shown.  
652 Ooplasmic halving significantly reduced the rate of errors (\*\* $P < 0.01$ ).

653 (B) Predivision was predominant in biparental meiosis. Chromosome  
654 segregation error patterns were categorized based on anaphase trajectories:  
655 nondisjunction (0:4 segregation), balanced predivision (2:2 sister chromatid  
656 segregation), unbalanced predivision (1:3 segregation including sister chromatid  
657 segregation), and complex patterns including predivision (multiple errors  
658 including sister chromatid segregation). Chromosome breakages (chromosomes  
659 lacking centromeres) were also observed.

660 (C) Univalent-like chromosomes. Images were 3D-reconstructed as in Fig. 2B  
661 and viewed from the top of the metaphase plate. Red surfaces with white  
662 arrowheads indicate univalent-like chromosomes. Scale bar = 3  $\mu\text{m}$ .

663 (D) Halving the ooplasm volume suppressed the premature separation of  
664 paternal chromosomes. Oocytes were categorized based on whether the  
665 chromosomes exhibited premature separation into univalent-like structures prior  
666 to segregation errors.

667 (E) Summary of biparental meiosis. In normal-sized oocytes this frequently  
668 exhibits premature separation of paternal chromosomes into univalent-like  
669 structures. These chromosomes undergo predivision (premature segregation of  
670 sister chromatids), and thus result in separated chromatids in MII oocytes.  
671 Halving the ooplasmic volume reduced such errors.

672

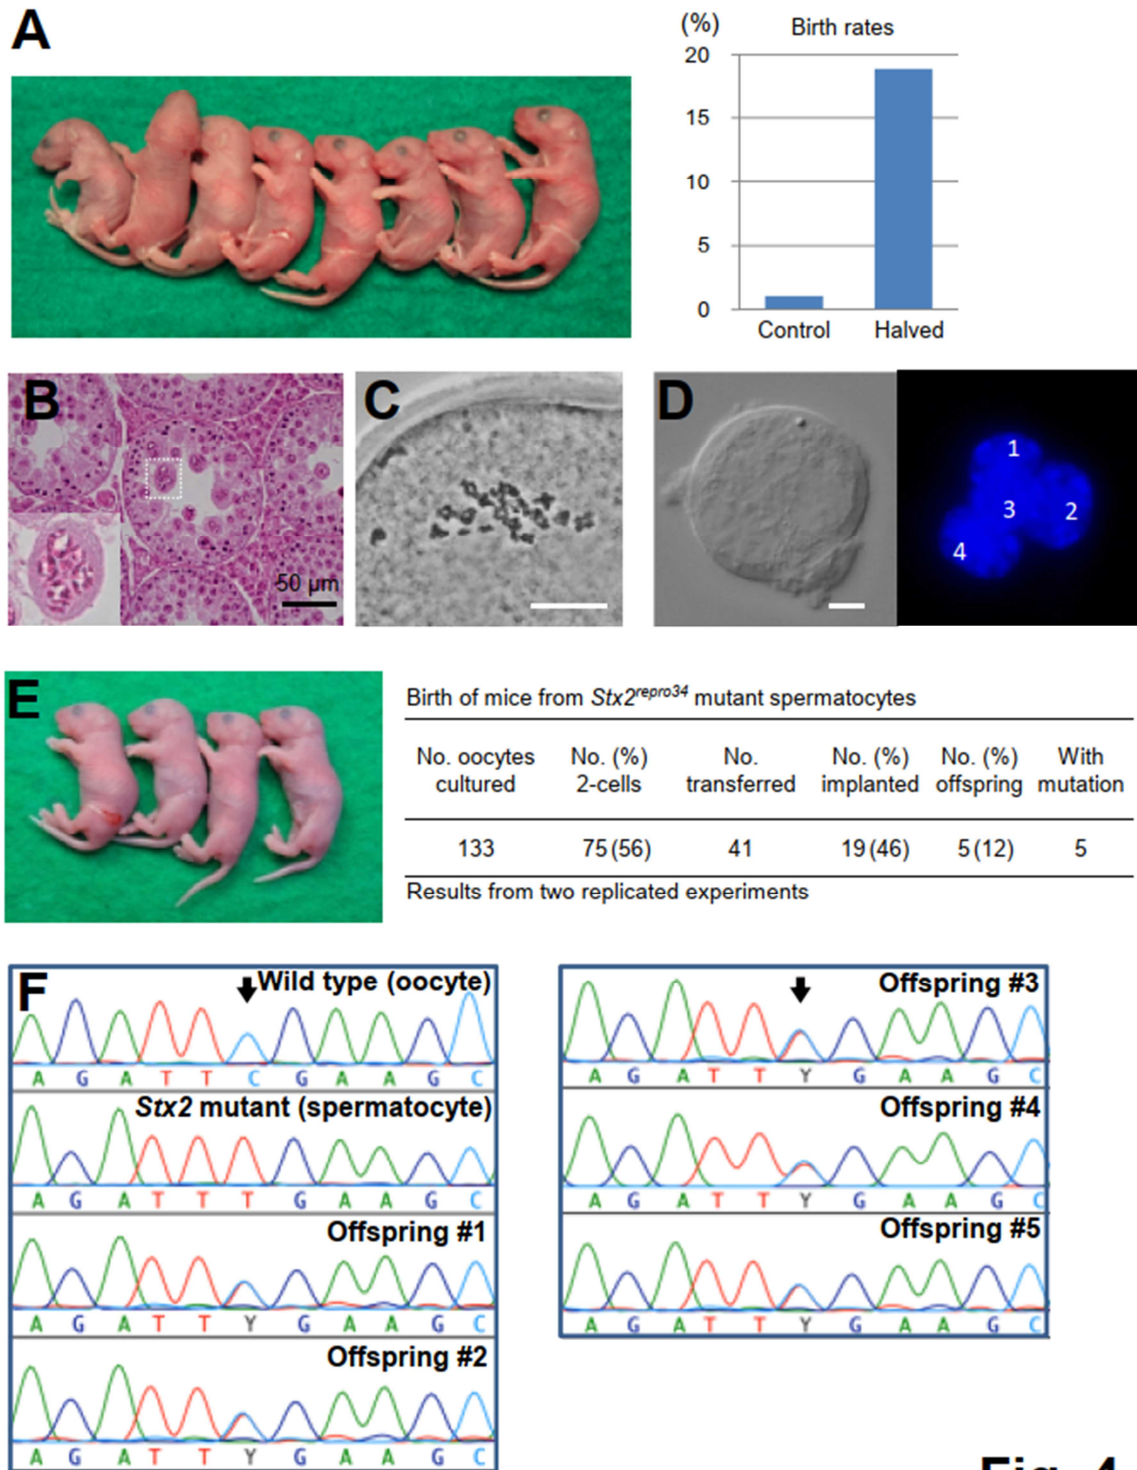

**Fig. 4**

673

674

675 **Figure 4. Birth of Spermatoocyte-derived Offspring Following Embryo**  
676 **Transfer**  
677 (A) Mouse pups born following spermatoocyte injection (left) and the birth rates  
678 following embryo transfer (right). For detailed results, see also [Table S2](#).  
679 (B) Histology of the testis of a *Stx2<sup>repro34</sup>* mouse. Arrowheads indicate  
680 multinucleated cells containing spermatoocyte-like nuclei. There are no  
681 spermatids or spermatozoa. Bar = 50  $\mu\text{m}$ .  
682 (C) An MII oocyte injected with a putative spermatoocyte nucleus from a  
683 multinucleated cell in a *Stx2<sup>repro34</sup>* mouse testis, showing the typical paired  
684 meiotic chromosomes. Bar = 20  $\mu\text{m}$ .  
685 (D) A multinucleated cell isolated from a *Stx2<sup>repro34</sup>* mouse testis, showing four  
686 nuclei. Differential interference contrast (left) and Hoechst-stained (right)  
687 images. Bar = 10  $\mu\text{m}$ .  
688 (E) (left) mouse pups born following microinjection with putative primary  
689 spermatoocyte nuclei isolated from multinucleated cells; (right) birth rate of pups  
690 following *Stx2<sup>repro34</sup>* spermatoocyte microinjection.  
691 (F) Genomic sequencing confirming the origin of pups from *Stx2<sup>repro34</sup>*  
692 spermatoocytes. Arrows indicate the expected point mutation of *Stx2<sup>repro34</sup>*. Y  
693 indicates a hybrid status with T and C bases.  
694
